# Supplementary material
Source: Springer Nature journal article supplement (https://www.springermedizin.de/resource/supplementary/12885_2010_2533_MOESM4_ESM.pdf/9462292)

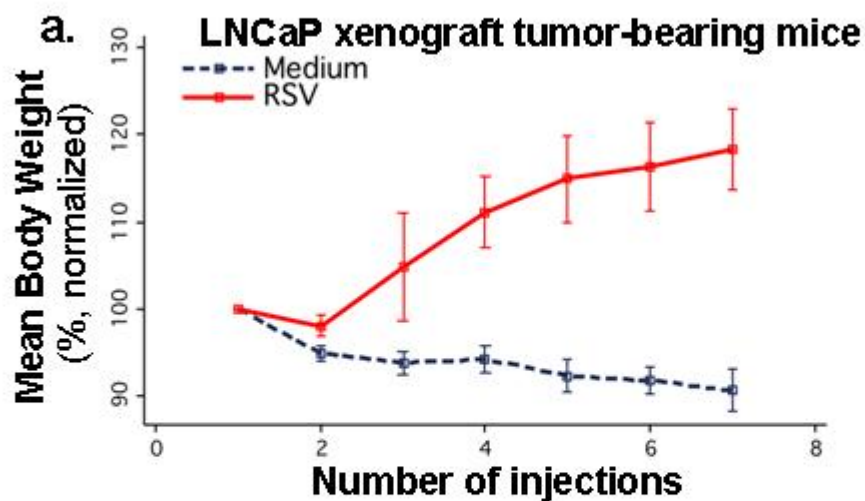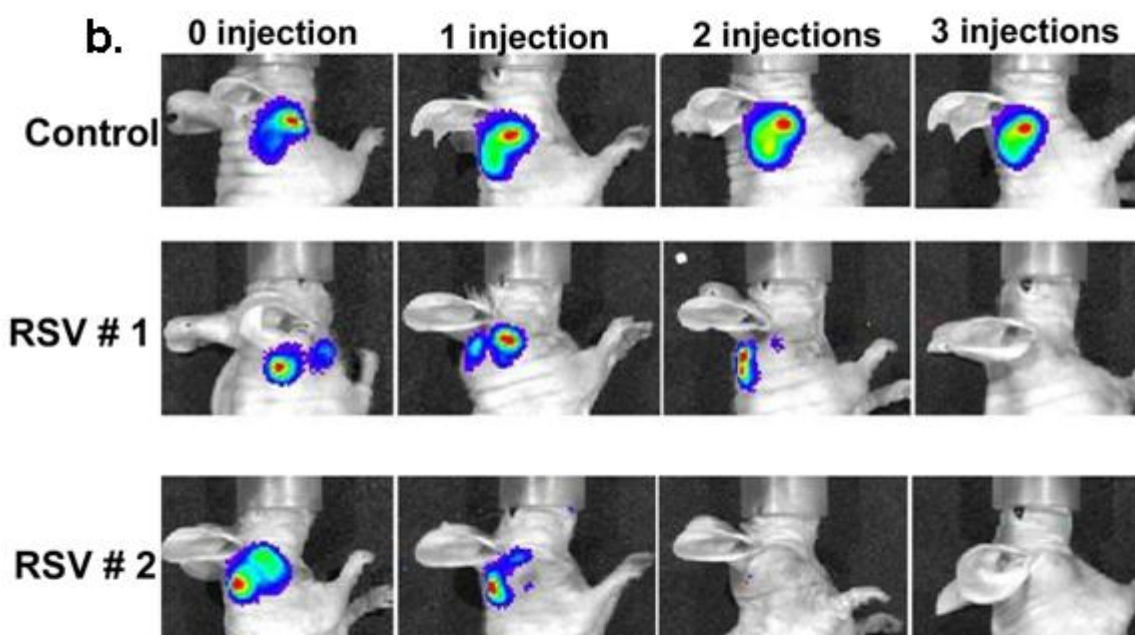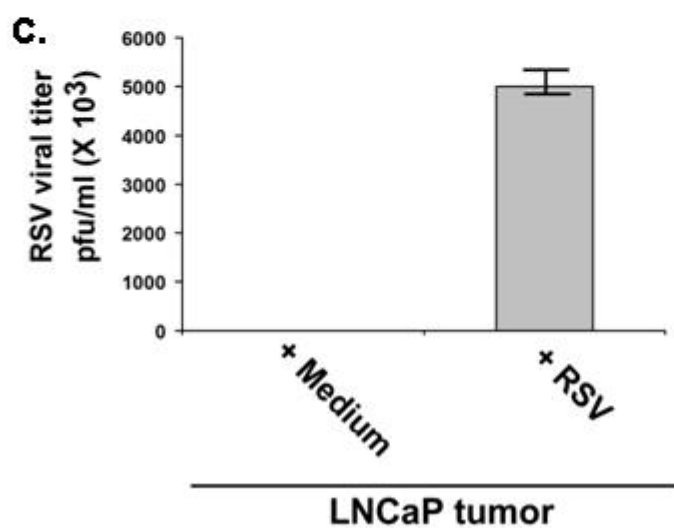

Supplement: MOESM4 [file 9462292]
